# Supplementary material
Source: publisher site journal article supplement (https://www.spandidos-publications.com/919/downloadSupplementary)
Supplement: Supplementary file 1 [file downloadSupplementary]

## Sheet: estimate
Table SII. After normalizing the data of 130 samples, the immune score, stromal score, and estimate score were calculated by immunocyte-related genes.
Input Sample	Status	Time	StromalScore	ImmuneScore	TumorPurity	group
R01_003	0	666	-935.648	-575.538	0.927487	low_risk
R01_006	0	2297	-1041.3	-92.6351	0.905373	low_risk
R01_012	0	3149	413.004	878.009	0.700647	low_risk
R01_013	0	3500	-277.279	937.906	0.763578	low_risk
R01_014	0	1921	-154.543	610.18	0.782659	low_risk
R01_016	0	3222	-686.97	441.065	0.842499	low_risk
R01_017	1	479	-231.552	168.066	0.827774	low_risk
R01_021	0	2330	-965.176	62.3144	0.890453	low_risk
R01_022	0	3259	-499.87	775.113	0.798865	low_risk
R01_023	0	1070	-214.736	973.708	0.754178	low_risk
R01_024	1	521	49.6617	796.307	0.745731	low_risk
R01_026	1	2408	595.245	-430.631	0.808528	low_risk
R01_028	0	2140	386.631	2042.68	0.572224	low_risk
R01_032	0	2643	412.366	2061.52	0.566845	low_risk
R01_034	0	2600	-218.095	473.94	0.800575	low_risk
R01_037	1	408	-309.369	1624.86	0.698078	low_risk
R01_038	0	205	724.548	1498.82	0.59675	low_risk
R01_041	0	2528	-948.327	115.818	0.885706	low_risk
R01_043	0	1886	-473.03	633.357	0.808898	low_risk
R01_048	0	2309	649.981	1184.61	0.641546	low_risk
R01_049	0	1980	-266.114	719.671	0.782849	low_risk
R01_054	0	2141	-1213.64	-650.644	0.94561	low_risk
R01_056	0	2115	313.597	1084.07	0.689391	low_risk
R01_057	1	1153	-331.917	1166.65	0.746828	low_risk
R01_059	0	2231	-700.293	636.567	0.827794	low_risk
R01_060	0	2158	259.763	729.96	0.731507	low_risk
R01_061	0	2148	-561.509	1294.74	0.756653	low_risk
R01_062	0	1991	963.638	2377.92	0.457611	low_risk
R01_063	0	1995	-404.271	892.752	0.779649	low_risk
R01_064	0	1971	460.753	1507.12	0.626417	low_risk
R01_066	1	293	-521.57	599.178	0.815977	low_risk
R01_067	0	2000	283.155	2189.72	0.566967	low_risk
R01_068	0	1982	-80.5357	1671.18	0.668597	low_risk
R01_069	0	1856	-1565.32	-382.842	0.949543	low_risk
R01_072	1	401	-128.706	1639.49	0.677269	low_risk
R01_073	0	1976	-1561.93	-416.125	0.95091	low_risk
R01_076	0	1935	416.106	580.041	0.730863	low_risk
R01_078	1	1213	187.32	847.728	0.726954	low_risk
R01_079	0	1401	-67.8061	879.911	0.749033	low_risk
R01_080	0	2010	-668.327	559.355	0.831501	low_risk
R01_081	0	1975	-92.1806	1054.85	0.734209	low_risk
R01_084	0	797	96.7859	-263.918	0.836214	low_risk
R01_089	0	1794	429.516	587.543	0.728765	low_risk
R01_091	1	1048	349.077	1606.28	0.627848	low_risk
R01_094	0	1794	672.807	2323.94	0.50201	low_risk
R01_098	0	1378	58.5677	1035.33	0.720996	low_risk
R01_099	1	1222	-260.493	419.635	0.809	low_risk
R01_100	1	903	213.936	1089.22	0.699374	low_risk
R01_101	1	1499	635.732	1823.28	0.568642	low_risk
R01_102	0	375	1583.14	1754.92	0.458068	low_risk
R01_104	0	1458	53.8125	793.233	0.745625	low_risk
R01_105	0	791	1208.14	2454.42	0.415222	low_risk
R01_107	0	1488	-129.946	176.61	0.818594	low_risk
R01_109	0	1840	468.518	1820.94	0.588937	low_risk
R01_110	0	763	856.116	2066.38	0.511406	low_risk
R01_111	0	1588	845.043	1299.97	0.605939	low_risk
R01_112	1	463	-49.6985	1416.75	0.692639	low_risk
R01_113	1	683	651.324	2466.66	0.486541	low_risk
R01_114	0	1618	-78.7204	741.9	0.763336	low_risk
R01_115	0	1555	-384.322	837.43	0.78289	low_risk
R01_116	0	1612	1294.67	2033.88	0.459308	low_risk
R01_117	1	1134	-1094.14	-326.403	0.922431	low_risk
R01_118	0	1476	2012.25	1859.02	0.387162	low_risk
R01_120	0	2145	480.232	1383.02	0.638314	low_risk
R01_121	0	1209	269.819	1881.62	0.605189	low_risk
R01_122	0	615	1301.52	2137.19	0.444886	low_risk
R01_123	0	1456	366.111	1419.28	0.64707	low_risk
R01_125	0	1511	-950.596	-896.57	0.94479	low_risk
R01_126	0	1521	705.646	1105.63	0.644168	low_risk
R01_127	0	1425	-85.4305	661.593	0.771525	low_risk
R01_128	1	375	267.868	1142.04	0.688088	low_risk
R01_130	0	258	533.984	1468.33	0.622468	low_risk
R01_131	0	1282	645.781	1164.31	0.644301	low_risk
R01_132	0	1282	-610.737	590.23	0.824218	low_risk
R01_133	1	650	1067.84	1956.37	0.49852	low_risk
R01_134	0	20	341.057	918.567	0.703927	low_risk
R01_136	0	1190	432.808	1609.31	0.617885	low_risk
R01_137	0	69	849.407	1900.59	0.533	low_risk
R01_138	1	86	224.367	1598.4	0.642877	low_risk
R01_140	0	118	-1129.9	94.9342	0.899109	low_risk
R01_141	0	1248	244.895	2525.62	0.530449	low_risk
R01_142	0	1148	805.688	1485.01	0.58879	low_risk
R01_144	0	1009	120.928	805.513	0.737809	low_risk
R01_147	0	2462	-77.528	460.098	0.78929	low_risk
R01_149	0	1915	-270.865	-1331.48	0.932406	low_risk
R01_151	0	1790	-248.235	-118.802	0.851944	low_risk
R01_152	1	703	780.598	1524.27	0.587107	low_risk
R01_154	1	37	112.495	1429.19	0.673924	low_risk
R01_160	0	2151	-568.966	379.622	0.837997	low_risk
R01_004	0	1172	-72.9938	1695.13	0.665153	high_risk
R01_005	1	1548	-1088.42	-760.867	0.944892	high_risk
R01_007	1	1079	-887.679	1152.76	0.799761	high_risk
R01_015	1	472	1827.18	2467.95	0.329086	high_risk
R01_018	1	1280	-1189.99	-602.779	0.942143	high_risk
R01_027	0	2208	80.6105	2153.52	0.595481	high_risk
R01_029	1	319	-1943.46	-691.477	0.976287	high_risk
R01_031	1	2241	-653.001	719.153	0.816948	high_risk
R01_033	1	528	-681.905	-217.169	0.890199	high_risk
R01_035	1	1840	-152.285	1259.67	0.719622	high_risk
R01_039	1	581	359.177	1462.04	0.643051	high_risk
R01_040	1	2327	1578.21	2048.98	0.41994	high_risk
R01_042	1	43	-45.1605	533.491	0.779663	high_risk
R01_046	0	2240	-305.833	446.495	0.810592	high_risk
R01_051	1	267	-496.472	-517.534	0.897758	high_risk
R01_052	0	2212	-1113.71	134.034	0.895527	high_risk
R01_055	1	1251	1215.07	1499.36	0.53741	high_risk
R01_065	1	378	-1008.56	-1247.73	0.962753	high_risk
R01_071	1	1447	-2197.48	-447.297	0.976598	high_risk
R01_077	1	1381	-39.825	-22.1236	0.827647	high_risk
R01_083	1	518	553.854	2321.86	0.517296	high_risk
R01_093	1	499	-595.967	-151.526	0.879843	high_risk
R01_096	0	1838	1084.82	2129.11	0.474189	high_risk
R01_097	1	1369	-241.77	-568.301	0.884172	high_risk
R01_103	1	229	171.547	1874.03	0.617485	high_risk
R01_106	1	14	245.827	1368.03	0.66606	high_risk
R01_108	0	1849	170.261	1894.54	0.615264	high_risk
R01_119	1	239	212.552	621.711	0.746874	high_risk
R01_124	0	1370	-500.213	390.548	0.831558	high_risk
R01_129	0	66	489.074	2782.17	0.466764	high_risk
R01_135	0	21	849.088	709.72	0.672065	high_risk
R01_139	0	1272	1083.62	2292.56	0.453087	high_risk
R01_145	0	763	1902.77	2476.51	0.317395	high_risk
R01_146	1	981	-48.0229	63.7712	0.821192	high_risk
R01_148	1	807	1619.76	1820.94	0.444624	high_risk
R01_150	0	831	-1406.76	-132.342	0.929011	high_risk
R01_153	0	2734	669.218	2918.74	0.42516	high_risk
R01_156	1	483	-514.069	-1006.88	0.928022	high_risk
R01_157	0	60	-716.137	-191.364	0.890762	high_risk
R01_158	0	359	-1101.94	-671.446	0.941186	high_risk
R01_159	0	231	347.245	1959.24	0.586916	high_risk
